# Supplementary material for: High-throughput metabolomic method based on liquid chromatography: high resolution mass spectrometry with chemometrics for metabolic biomarkers and pathway analysis to reveal the protective effects of baicalin on thyroid cancer
Source: Royal Society of Chemistry journal article supplement (doi:10.1039/d0ay00977f), 2020-01-01
Supplement: d0ay00977f1.pdf [file d0ay00977f1.pdf]

Table S1 The differentially expressed metabolites in human thyroid cancer cells by ultra-high performance liquid chromatography-mass spectrometry metabolomic profiles.

| Ion form           | Rt(min) | m/z    | Formula                                                       | Proposed compound                  | HMDB      | p value     | Trend before treatment |
|--------------------|---------|--------|---------------------------------------------------------------|------------------------------------|-----------|-------------|------------------------|
| [M+H] <sup>+</sup> | 2.78    | 347.22 | C <sub>21</sub> H <sub>30</sub> O <sub>4</sub>                | Corticosterone                     | HMDB01547 | 8.69E-13    | ↑                      |
| [M+H] <sup>+</sup> | 8.22    | 256.26 | C <sub>16</sub> H <sub>33</sub> NO                            | Palmitic amide                     | HMDB12273 | 7.74E-13    | ↓                      |
| [M+H] <sup>+</sup> | 9.58    | 380.26 | C <sub>18</sub> H <sub>38</sub> NO <sub>5</sub> P             | Sphingosine 1-phosphate            | HMDB00277 | 1.41E-07    | ↓                      |
| [M+H] <sup>+</sup> | 9.87    | 494.32 | C <sub>24</sub> H <sub>48</sub> NO <sub>7</sub> P             | LysoPC(16:1(9Z))                   | HMDB10383 | 2.30E-05    | ↑                      |
| [M+H] <sup>+</sup> | 10.06   | 482.32 | C <sub>23</sub> H <sub>48</sub> NO <sub>7</sub> P             | LysoPC(15:0)                       | HMDB10381 | 9.52E-11    | ↓                      |
| [M+H] <sup>+</sup> | 10.21   | 544.34 | C <sub>28</sub> H <sub>50</sub> NO <sub>7</sub> P             | LysoPC(20:4(5Z,8Z,11Z,14Z))        | HMDB10395 | 3.69E-10    | ↓                      |
| [M+H] <sup>+</sup> | 10.32   | 400.34 | C <sub>23</sub> H <sub>45</sub> NO <sub>4</sub>               | L-Palmitoylcarnitine               | HMDB00222 | 1.11E-16    | ↓                      |
| [M-H] <sup>-</sup> | 1.03    | 243.06 | C <sub>9</sub> H <sub>12</sub> N <sub>2</sub> O <sub>6</sub>  | Uridine                            | HMDB00296 | 2.76E-14    | ↑                      |
| [M-H] <sup>-</sup> | 4.13    | 212.00 | C <sub>8</sub> H <sub>7</sub> NO <sub>4</sub> S               | Indoxyl sulfate                    | HMDB00682 | 1.71E-06    | ↓                      |
| [M+H] <sup>+</sup> | 9.93    | 437.29 | C <sub>24</sub> H <sub>40</sub> O <sub>4</sub>                | 3a,12b-Dihydroxy-5b-cholanoic acid | HMDB00364 | 1.13E-10    | ↓                      |
| [M+H] <sup>+</sup> | 11.68   | 480.31 | C <sub>23</sub> H <sub>48</sub> NO <sub>7</sub> P             | LysoPE(18:0/0:0)                   | HMDB11130 | 0.000313925 | ↓                      |
| [M-H] <sup>-</sup> | 0.60    | 125.01 | C <sub>2</sub> H <sub>7</sub> NO <sub>3</sub> S               | Taurine                            | HMDB00251 | 0.00015987  | ↑                      |
| [M-H] <sup>-</sup> | 0.63    | 117.15 | C <sub>5</sub> H <sub>11</sub> NO <sub>2</sub>                | L-Valine                           | HMDB00883 | 0.001283762 | ↓                      |
| [M+H] <sup>+</sup> | 0.65    | 114.07 | C <sub>4</sub> H <sub>7</sub> N <sub>3</sub> O                | Creatinine                         | HMDB00562 | 2.75E-08    | ↑                      |
| [M+H] <sup>+</sup> | 0.66    | 158.12 | C <sub>4</sub> H <sub>6</sub> N <sub>4</sub> O <sub>3</sub>   | Allantoin                          | HMDB00462 | 3.88E-12    | ↓                      |
| [M-H] <sup>-</sup> | 0.73    | 242.23 | C <sub>10</sub> H <sub>14</sub> N <sub>2</sub> O <sub>5</sub> | Thymidine                          | HMDB00273 | 2.85E-14    | ↓                      |
| [M-H] <sup>-</sup> | 0.90    | 216.24 | C <sub>8</sub> H <sub>16</sub> N <sub>4</sub> O <sub>3</sub>  | N-a-acetyl-L-arginine              | HMDB04620 | 6.58E-05    | ↑                      |
| [M-H] <sup>-</sup> | 1.01    | 146.10 | C <sub>6</sub> H <sub>8</sub> O <sub>5</sub>                  | Oxoglutaric acid                   | HMDB02070 | 0.026311686 | ↑                      |
| [M+H] <sup>+</sup> | 2.47    | 165.08 | C <sub>6</sub> H <sub>12</sub> O <sub>5</sub>                 | L-Fucose                           | HMDB00174 | 2.54E-12    | ↑                      |

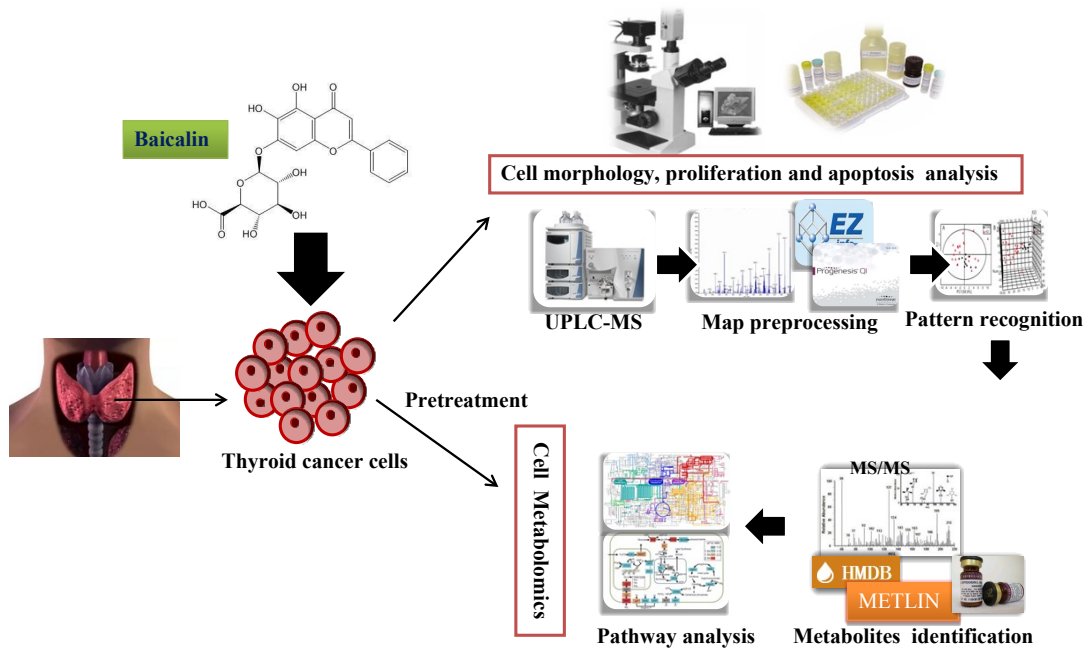

Figure S1 The flow diagram of this study based on high-throughput ultra-high performance liquid chromatography-mass spectrometry cell metabolomic profiles strategy.

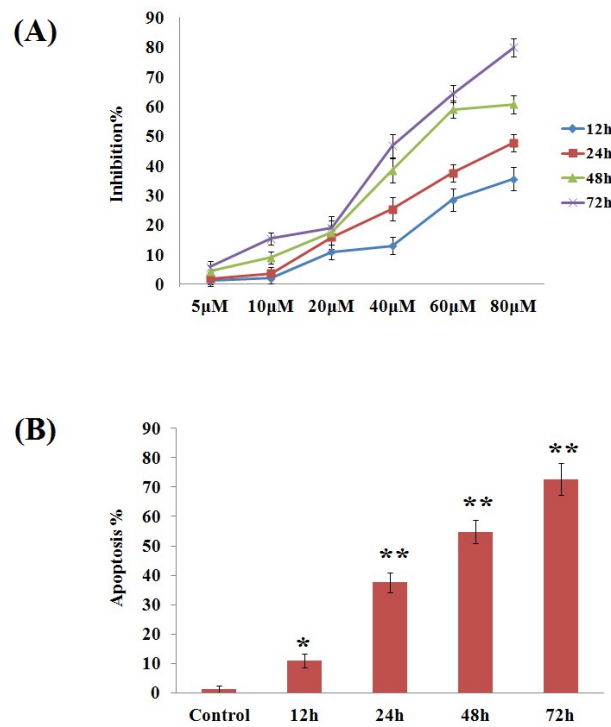

Figure S2 (A) Baicalin caused the cell morphological changes on human thyroid cancer cells as the time change. (B) Baicalin inhibited the proliferation of SW579 human thyroid cancer cells at the concentrations of 5 µM, 10 µM, 20 µM, 40 µM, 60µM, 80µM for 12h,24 h, 48 h, 72 h. (C) Baicalin at the concentrations of 80 µM induce the apoptosis rate change of SW579 human thyroid cancer cells for 12h, 24 h, 48 h, 72 h.
